# Supplementary material
Source: PubMed Central journal article supplement (PMC11181433)
Supplement: NIHPP2023.10.31.560822V2-supplement-1.pdf [file NIHPP2023.10.31.560822V2-supplement-1.pdf]

601 **Supplementary Materials for**

602 **Critical role of CD206+ macrophages in promoting a cDC1-NK-CD8 T cell**  
603 **anti-tumor immune axis**

604

605 Arja Ray<sup>1,2</sup>, Kenneth H. Hu<sup>1,2,#</sup>, Kelly Kersten<sup>1,2,##</sup>, Tristan Courau<sup>1,2</sup>, Nicholas F. Kuhn<sup>1,2</sup>,  
606 Itzia Zaleta-Linares<sup>1,2</sup>, Bushra Samad<sup>2,3</sup>, Alexis J. Combes<sup>1,2,3,4</sup>, Matthew F. Krummel<sup>1,2,3\*</sup>

607

608

609 **Affiliations:**

610 <sup>1</sup>Department of Pathology, <sup>2</sup>ImmunoX Initiative, <sup>3</sup>UCSF CoLabs, <sup>4</sup>Department of  
611 Medicine, University of California, San Francisco, CA 94143, USA. <sup>#</sup>Current Address:  
612 Department of Immunology, The University of Texas MD Anderson Cancer Center  
613 and James P Allison Institute. <sup>##</sup>Current Address: Cancer Metabolism and  
614 Microenvironment Program, Sanford Burnham Prebys Medical Discovery Institute, La  
615 Jolla, CA 92037, USA.

616

617

618

619

620 **\*Corresponding Author:**

621 Matthew F. Krummel, Ph.D.  
622 513 Parnassus Avenue, HSW 512  
623 San Francisco, CA 94143-0511  
624 [matthew.krummel@ucsf.edu](mailto:matthew.krummel@ucsf.edu)  
625 Tel: (415) 514-3130  
626 Fax: (415) 514-3165

627

628

629 **Materials and Methods:**

630 **Mice:** All mice were treated in accordance with the regulatory standards of the National Institutes  
631 of Health and American Association of Laboratory Animal Care and were approved by the UCSF  
632 Institution of Animal Care and Use Committee. *Mrc1*(CD206)<sup>LSL-Venus-DTR</sup> mice in the C57BL6/J  
633 background were custom-generated from Biocytogen Inc. and then maintained heterozygous  
634 (bred to C57BL6/J wild type mice) at the UCSF Animal Barrier facility under specific pathogen-  
635 free conditions. C57BL6/J, C57BL6/J CD45.1 (B6.SJL-Ptprc<sup>a</sup> Pepc<sup>b</sup>/BoyJ), OT-I (C57BL/6-  
636 Tg(TcraTcrb)1100Mjb/J), *Csf1r*<sup>Cre</sup> (C57BL/6-Tg(Csf1r-cre)1Mnz/J) mice were purchased for use  
637 from Jackson Laboratories and maintained in the same facility in the C57BL6/J background. For  
638 adoptive transfer experiments, CD45.1<sup>het</sup>; OT-I<sup>het</sup> (denoted simply as CD45.1; OT1) mice were  
639 used. Mice of either sex ranging in age from 6 to 14 weeks were used for experimentation.

640

641 **Depletion of select immune cell populations:** For depletion of CD206-expressing  
642 macrophages, 500ng (20ng/g body weight, assuming an average 25g weight for each mouse)  
643 diphtheria toxin (DTx; List Biological Laboratories) in 100µL 1X PBS was injected intraperitoneally  
644 into each mouse – for both *Csf1r*<sup>Cre</sup>; *Mrc1*(CD206)<sup>LSL-Venus-DTR</sup> (DTR) and *Mrc1*(CD206)<sup>LSL-Venus-DTR</sup>  
645 (WT) groups - at every time point. For the early depletion regime, injections were started 2 days  
646 after adoptive transfer of T cells and continued every 2-3 days till endpoint, while for the late  
647 depletion regime, injections began at d10 after T cell injection and continued till endpoint. For  
648 testing the effects of DTx in tumor-free tissue, similar dosing of DTx as the early depletion regime  
649 was implemented without tumor injection, and the skin (ectopic tumor site) and skin-draining  
650 lymph nodes were isolated for analysis. Mice were found to be healthy and without frank health  
651 issues with 6 doses of 500ng DTx (early depletion regime), but were monitored nevertheless  
652 throughout the experiment, as per IACUC guidelines.

653 For depletion of neutrophils, mice were treated with 200µg/dose of anti-Ly6G antibody (Clone  
654 1A8, InvivoMAb) in PBS intraperitoneally every 2-3 days starting one dose after the beginning of

655 DTx treatment and coincident with DTx treatment thereafter. Control mice were similarly treated  
656 with the corresponding isotype control antibody (Clone 2A3, InvivoMAb).

657

658 **Mouse tumor digestion and flow cytometry:** Tumors from mice were processed to generate  
659 single cell suspensions as described previously(18). Briefly, tumors were isolated and  
660 mechanically minced on ice using razor blades, followed by enzymatic digestion with 200 µg/mL  
661 DNase (Sigma-Aldrich), 100U/mL Collagenase I (Worthington Biochemical) and 500U/mL  
662 Collagenase IV (Worthington Biochemical) for 30 min at 37°C while shaking. Digestion was  
663 quenched by adding excess 1X PBS, filtered through a 100µm mesh, spun down and red blood  
664 cells were removed by incubating with RBC lysis buffer (155 mM NH<sub>4</sub>Cl, 12 mM NaHCO<sub>3</sub>, 0.1 mM  
665 EDTA) at room temperature for 10 mins. The lysis was quenched with excess 1X PBS, spun down  
666 and resuspended in FACS buffer (2mM EDTA + 1% FCS in 1X PBS) to obtain single cell  
667 suspensions. Similarly, tumor draining lymph nodes (dLN) were isolated and mashed over 100µm  
668 filters in PBS to generate single cell suspensions. For counting absolute numbers of cells,  
669 CountBright Absolute Counting Beads were added to the cell suspensions prior to staining, while  
670 noting the total weight of the tumor and the fraction of the total tumor cell digest used for staining.

671

672 For each sample, 2.5-3 million cells/sample were stained in a total of 50µL of antibody mixture for  
673 flow cytometry. Cells were washed with PBS prior to staining with Zombie NIR Fixable live/dead  
674 dye (1:500) (Biolegend) for 20 min at 4°C. Cells were washed in FACS buffer followed by surface  
675 staining for 30 min at 4°C with directly conjugated antibodies diluted in FACS buffer containing  
676 1:100 anti-CD16/32 (Fc block; BioXCell) to block non-specific binding. Antibody dilutions ranged  
677 from 1:100-1:400, optimized separately. After surface staining, cells were washed again with  
678 FACS buffer. For intracellular staining, cells were fixed for 20 min at 4°C using the IC Fixation  
679 Buffer (BD Biosciences) and washed in permeabilization buffer from the FoxP3 Fix/Perm Kit (BD  
680 Biosciences). Antibodies against intracellular targets were diluted in permeabilization buffer

681 containing 1:100 Fc Block and cells were incubated for 30 min at 4°C followed by another wash  
682 prior to readout on a BD LSRII or Fortessa Cytometer.

683

684 **Processing and flow cytometry analysis of other mouse organs:** To phenotype cells from  
685 lymphoid organs, inguinal, axillary and brachial (tumor-draining) lymph nodes were isolated, pried  
686 open with tweezers (lymph nodes) or cut into small pieces (spleen) and digested with the same  
687 digestion cocktail as above, intermittently pipetting with cut P1000 pipette tips to enhance  
688 mechanical digestion. The resulting suspensions were then filtered using 100µm filter, washed  
689 with 1X PBS to generate single cell suspensions. For splenic digests, RBC lysis was performed  
690 as described above before staining for flow cytometry.

691 For lung digests both lobes were isolated, cut into small pieces with scissors and minced by using  
692 gentleMACS dissociator (Miltenyi Biotec) in RPMI. Next, the mixture was spun down and  
693 resuspended in the digestion mixture described above and allowed to digest with shaking at 37°C  
694 for 20 mins, following which, the remaining tissue was either minced again using the gentleMACS  
695 dissociator and/or directly mashed over a 100µm filter in FACS buffer to generate a single cell  
696 suspension, ready to be processed for staining and flow cytometry.

697 Skin digestion was done as previously described(37). Briefly, mice were shaved and depilated  
698 prior to removal of dorsal skin. The skin was then rid of fat, minced with scissors and razor blade  
699 in the presence of 1 ml of digest media (2 mg/ml collagenase IV (Roche), 1 mg/ml hyaluronidase  
700 (Worthington), 0.1 mg/ml DNase I (Roche) in RPMI-1640 (GIBCO). The minced skin was then  
701 moved to a 50 ml conical with 5 ml additional digest solution and incubated at 37°C for 45 min  
702 with shaking and intermittent vortexing before being washed and passed through a 70µm strainer  
703 prior to staining.

704

705 **Flow cytometry Data Analysis:** Analysis of flow cytometry data was done on FlowJo and later  
706 plotted on GraphPad Prism or R. Relative MFI of the Venus reporter was calculated by subtracting

707 the background average MFI of the same channel in WT samples from those in each DTR sample.  
708 For analysis of a shift in relative abundance of a population x (Fig. 2), the  $\log_2$  (% x of CD45 in  
709 WT/ % x of CD45 in DTR) was calculated and plotted as a heatmap, such that positive values  
710 indicate depletion and negative values indicate enrichment.

711

712 **Tumor injections and adoptive transfer of CD8 T cells into tumors:** The B78chOVA and  
713 MC38chOVA cancer cell lines, as previously described(11, 18), were generated by incorporating  
714 the same mcherry-OVA construct used to establish the PyMTchOVA spontaneous mouse  
715 line(38). For tumor injections, the corresponding cells were grown to near confluency (cultured in  
716 DMEM with 10% FCS (Benchmark) and 1% PSG (Gibco)) and harvested using 0.05% Trypsin-  
717 EDTA (Gibco) and washed 3x with PBS (Gibco). The number of cells to be injected per mouse  
718 was resuspended in PBS to a final volume of 50 $\mu$ L per injection. The suspension was injected  
719 subcutaneously into the flanks of anesthetized and shaved mice. Tumors were allowed to grow  
720 for 14–21 days unless otherwise noted, before tumors and tumor-draining lymph nodes were  
721 harvested for analysis. CD8 T cells were isolated from CD45.1;OT-1;Cd69-TFP mice using the  
722 EasySep Negative Selection Kit (Stem Cell Bio), resuspended in 1X PBS at 10X concentration  
723 100 $\mu$ L was injected into each tumor-bearing mice. For B78chOVA 1 million and for MC38chOVA  
724 tumors, 200,000 CD8 T cells were injected retro-orbitally into each mouse either 5d (B78chOVA),  
725 7d (MC38chOVA) post tumor injection. Tumor measurements were done by measuring the  
726 longest dimension (length) and approximately perpendicular dimension (width) using digital  
727 calipers, rounded to one decimal place each. For experiments using the transgenic PyMTchOVA  
728 strain, mammary tumor-bearing females in the age range of 15 to 24 weeks were used when mice  
729 developed at least 2 palpable tumors.

730

731 **Spatial single cell RNA Sequencing and Analysis:** Spatial scSeq of immune cell populations  
732 at the tumor edge, interface and interior zones was performed using ZipSeq, as previously

733 described(11), with the additional condition of DTx treatment integrated into the dataset. Briefly,  
734 B78chOVA tumors subcutaneously grown in Csf1rCre; CD206<sup>LSL-Venus-DTR</sup> mice d12 post adoptive  
735 transfer of 1 million CD2dsRed; OT-I CD8 T cells with (DTx) and without (Control) DTx treatment  
736 (early depletion regime) were harvested and sliced into 160µm slices using a Compressotome  
737 (Precisionary Instruments VFZ-310-0Z). Imaging, spatial barcoding, subsequent digestion,  
738 sorting, encapsulation (10X Genomics) and library construction, CellRanger processing and  
739 alignment were performed as described previously(11, 19). The two separate sequencing runs  
740 (Control and DTx) were assembled and integrated into a single data structure using Harmony(39).  
741 The final object underwent scaling and then scoring for cell cycle signatures (S and G2M scores  
742 as computed using Seurat's built-in CellCycleScoring function. The object then underwent  
743 regression for cell cycle effects (S and G2M score as described in the Seurat vignette) and percent  
744 mitochondrial reads before PCA.

745  
746 Relative abundance from scSeq data was calculated by:  $\log_2$  (% of each cluster (cell type) within  
747 a tumor region (Edge, Mid, Inner) in the Ctrl / (% of the same cluster in the same region in the  
748 DTx treated group), thereby yielding positive values for depletion and negative values for  
749 enrichment. While abundances were calculated with the broad clusters from the overall object,  
750 the lymphoid clusters were isolated to a separate object, re-clustered to further probe for individual  
751 gene expression (*Cxcr3*, *Flt3l*, *Xcl1*) in the resulting subsets.

752  
753 **Transwell Assay of CD8 T cell migration:** For transwell assays, subcutaneously injected  
754 B78chOVA tumors grown for 14 days and then harvested, digested, and sorted for CD206+ vs.  
755 CD206- TAMs. 3 days before the sort, CD8 T cells from a B6 mouse were harvested and  
756 stimulated in vitro with anti-CD3/anti-CD28 Dynabeads (Thermo Fisher) for 24h, taken off the  
757 beads and rested in 10U/mL IL-2 for an additional 48h to produce effector-like CD8 T cells. Post-  
758 sort, 500,000 activated T cells were plated in 75µL T cell media (RPMI + 10% FCS + 50µM β -

759 marcaptoethanol) on top of a 5µm transwell insert (Corning), allowed to settle for 30mins and  
760 subsequently, 10,000 sorted CD206-, CD206+ TAMs or no TAMs were added to the bottom well  
761 to induce T cell migration. Cells at the bottom were collected at 3h, mixed with CountBright  
762 absolute counting beads, stained and analyzed by flow cytometry to quantify the number of CD8  
763 T cells migrated. Total number of CD8 T cells migrated in each condition was normalized to the  
764 average number of cells migrated in the no TAM condition.

765

766 **Human tumor samples:** All tumor samples were collected with patient consent after surgical  
767 resection under a UCSF IRB approved protocol (UCSF IRB# 20-31740), as described  
768 previously(23). In brief, freshly resected samples transported in ice-cold DPBS or Leibovitz's L-  
769 15 medium before digestion and processing to generate a single-cell suspension. The five most  
770 well-represented cancer indications in this collection were included in the cohort: Colorectal  
771 cancer (CRC), gynecological cancers (GYN), head and neck cancer (HNSC), kidney cancer  
772 (KID), lung cancer (LUNG). Clinical data including survival of patients were obtained through  
773 regular clinical follow-up at UCSF.

774

775 **Transcriptomic analysis of human tumors:** All tumor samples were collected under the UCSF  
776 Immunoprofiler project as described(23). Briefly, tumor samples were thoroughly minced with  
777 surgical scissors and transferred to GentleMACS Tubes containing 800 U/ml Collagenase IV and  
778 0.1 mg/ml DNase I in L-15/2% FCS per 0.3 g tissue. GentleMACS Tubes were then installed onto  
779 the GentleMACs Octo Dissociator (Miltenyi Biotec) and incubated for 20 min (lymph node) or  
780 35 min (tumor) according to the manufacturer's instructions. Samples were then quenched with  
781 15 mL of sort buffer (PBS/2% FCS/2mM EDTA), filtered through 100µm filters and spun down.  
782 Red blood cell lysis was performed with 175 mM ammonium chloride, if needed. Freshly digested  
783 tumor samples were sorted by FACS into conventional T cell, Treg, Myeloid, tumor and in some  
784 cases, stromal compartments and bulk RNA-seq was performed on sorted cell fractions. mRNA



785 was isolated from sorted fractions and libraries were prepared using Illumina Nextera XT DNA  
786 Library Prep kit. The libraries were sequenced using 100bp paired end sequencing on HiSeq4000.  
787 The sequencing reads we aligned to the Ensembl GRCh38.85 transcriptome build using  
788 STAR(40) and gene expression was computed using RSEM(41). Sequencing quality was  
789 evaluated by in-house the EHK score, where each sample was assigned a score of 0 through 10  
790 based on the number of EHK genes that were expressed above a precalculated minimum  
791 threshold. The threshold was learned from our data by examining the expression distributions of  
792 EHK genes and validated using the corresponding distributions in TCGA. A score of 10  
793 represented the highest quality data where 10 out of 10 EHK genes are expressed above the  
794 minimum threshold. The samples used for survival analysis and other gene expression analyses  
795 had an EHK score of greater than 7 to ensure data quality. Ensemble gene signatures scores  
796 were calculated by converting the expression of each gene in the signature to a percentile rank  
797 among all genes and then determining the mean rank of all the genes in the signature (17). The  
798 corresponding gene list for obtaining the stimulatory dendritic cell score is as described  
799 before(10).

800

801 **TCGA analyses.** Survival analyses using the TCGA dataset was performed using the TCGA sub-  
802 cohort described in(23). Briefly, tumor RNAseq counts and TPM along with curated clinical data  
803 for 13 cancer types (BLCA, COAD, GBM, GYN (grouping OV, UCEC and UCS), HNSC, KIRC,  
804 LIHC, LUAD, PAAD, SARC and SKCM) was filtered down to include primary solid tumors and  
805 metastatic samples only, to parallel the IPI cohort samples. This reduced the TCGA sample set  
806 to 4341 tumor samples. CD206<sup>Replete</sup> gene scores were generated by first normalizing (using  
807 percentiles) the expression values of each gene composing the signature across all patients,  
808 followed by averaging these normalized values for each patient. The same method was used for  
809 deriving CD206<sup>Depleted</sup> gene scores and we then calculated the ratio of CD206<sup>Replete</sup>/CD206<sup>Depleted</sup>  
810 gene scores by dividing each score value for each patient. For survival analysis, patients were



811 split into either CD206<sup>Replete</sup> gene score<sup>HIGH</sup> vs <sup>LOW</sup> (top/bottom 20% respectively, n=861) or  
812 (CD206<sup>Replete</sup>:CD206<sup>Depleted</sup> gene signature ratio)<sup>HIGH</sup> vs (CD206<sup>Replete</sup>:CD206<sup>Depleted</sup> gene signature  
813 ratio)<sup>LOW</sup> (top/bottom 20% respectively, n=861) and analyzed using a log-rank test.

814

815 **Two-photon imaging of tumor slices:** Tumor slices (adjacent to the ones used for spatial  
816 barcoding by ZipSeq) were fixed in 2% paraformaldehyde (PFA; Sigma), washed and left  
817 overnight in 1X PBS before imaging on a custom-made 2-photon microscope as previously  
818 described(10) to visualize the Venus reporter and CD2dsRed marked CD8 T cells and fibrous  
819 collagen by second harmonic generation (SHG). Dual laser excitations at 800nm and 950nm were  
820 used to excite the requisite fluorophores.

821

822 **Statistical Analysis:** Statistical analysis was done in GraphPad Prism or in R. For testing null  
823 hypothesis between two groups, either Student's t tests and or the non-parametric Mann-Whitney  
824 U tests were used, depending on the number and distribution of data points. Likewise, for testing  
825 null hypotheses among 3 or more groups, ANOVA or non-parametric tests were performed,  
826 followed by post-hoc test, correcting for false discovery rates (threshold = 0.05) in multiple  
827 comparisons. Unless otherwise mentioned, data are representative of at least 2 independent  
828 experiments.

829

830 **Supplementary Figures and Figure Legends:**

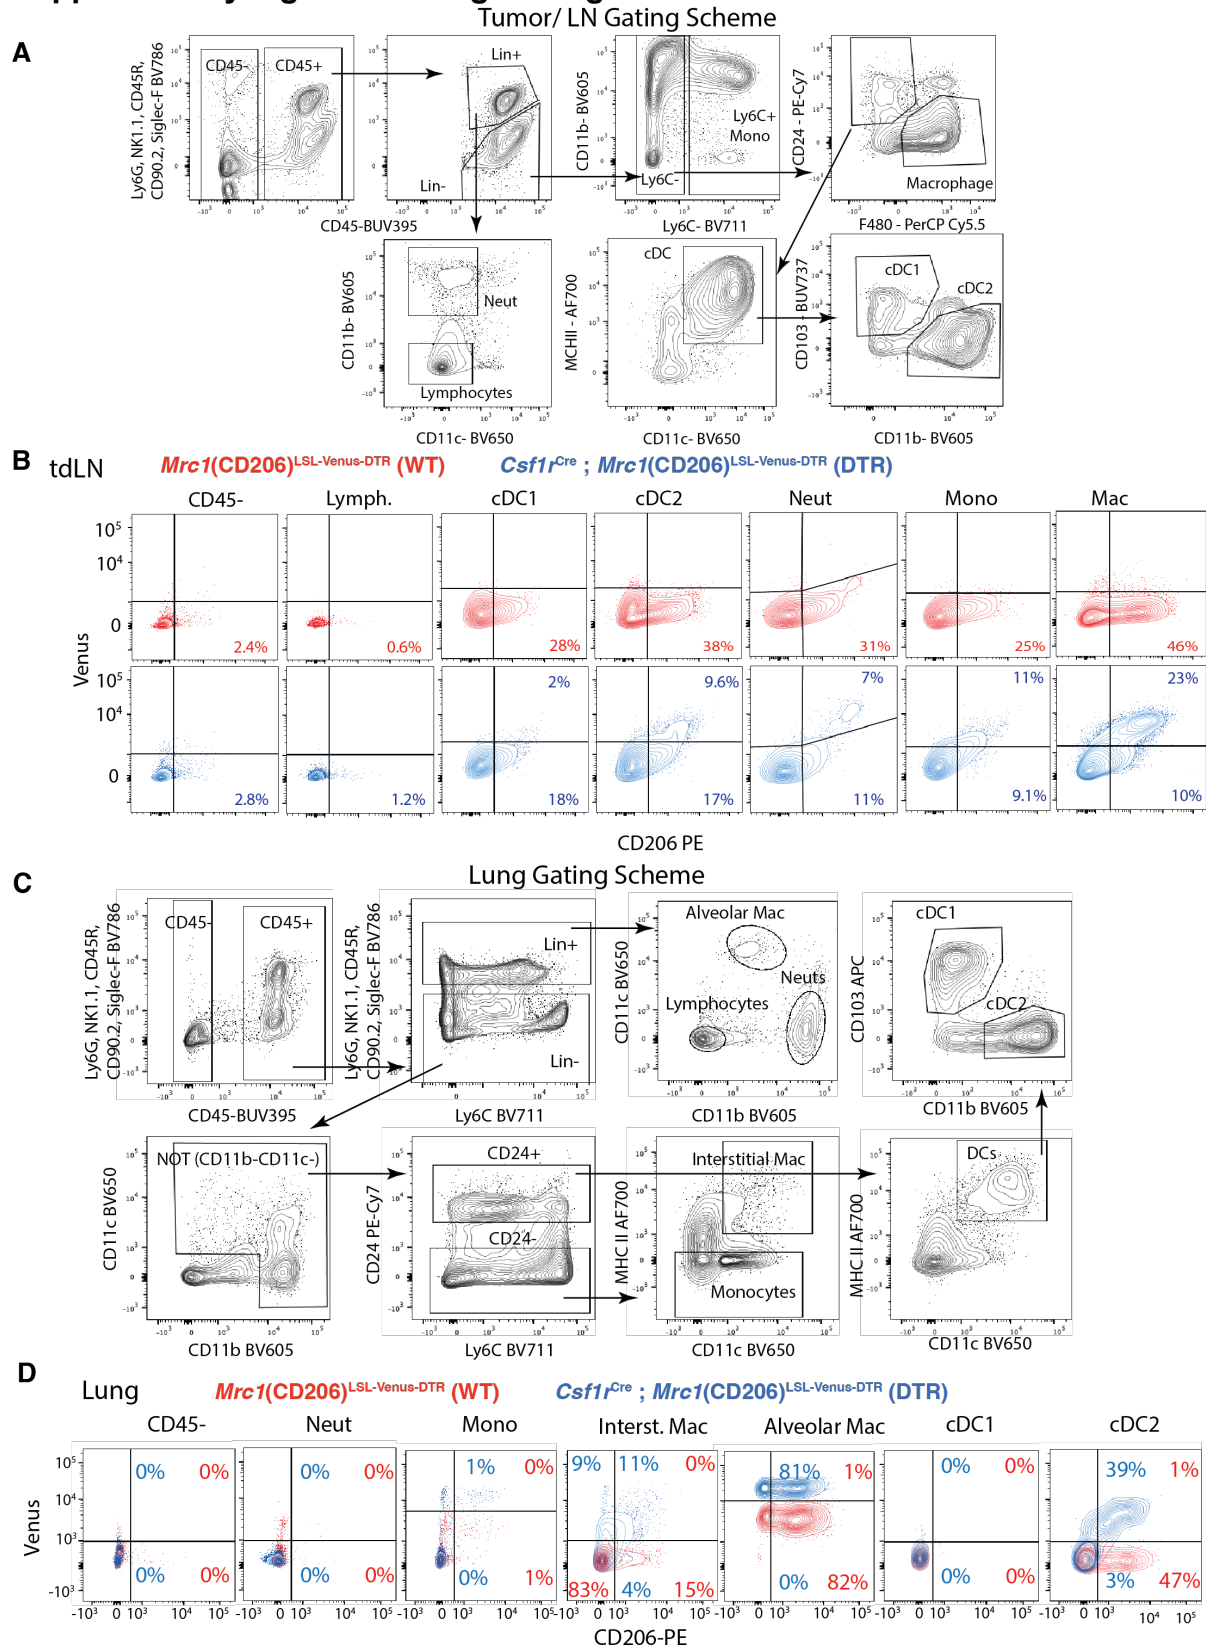

832 **Fig. S1:** Representative flow cytometry gating scheme to identify myeloid cells and lymphocytes  
833 from **(A)** tumor and tdLN and **(C)** lung; Flow cytometry plots showing reporter (Venus) and CD206  
834 expression in different immune cells in **(B)** d18 B78chOVA tdLN and **(C)** lung in WT (red;  $Mrc1^{LSL-$   
835  $Venus-DTR$ ) and DTR (blue;  $Csf1r^{Cre}; Mrc1^{LSL-Venus-DTR}$ ) mice.

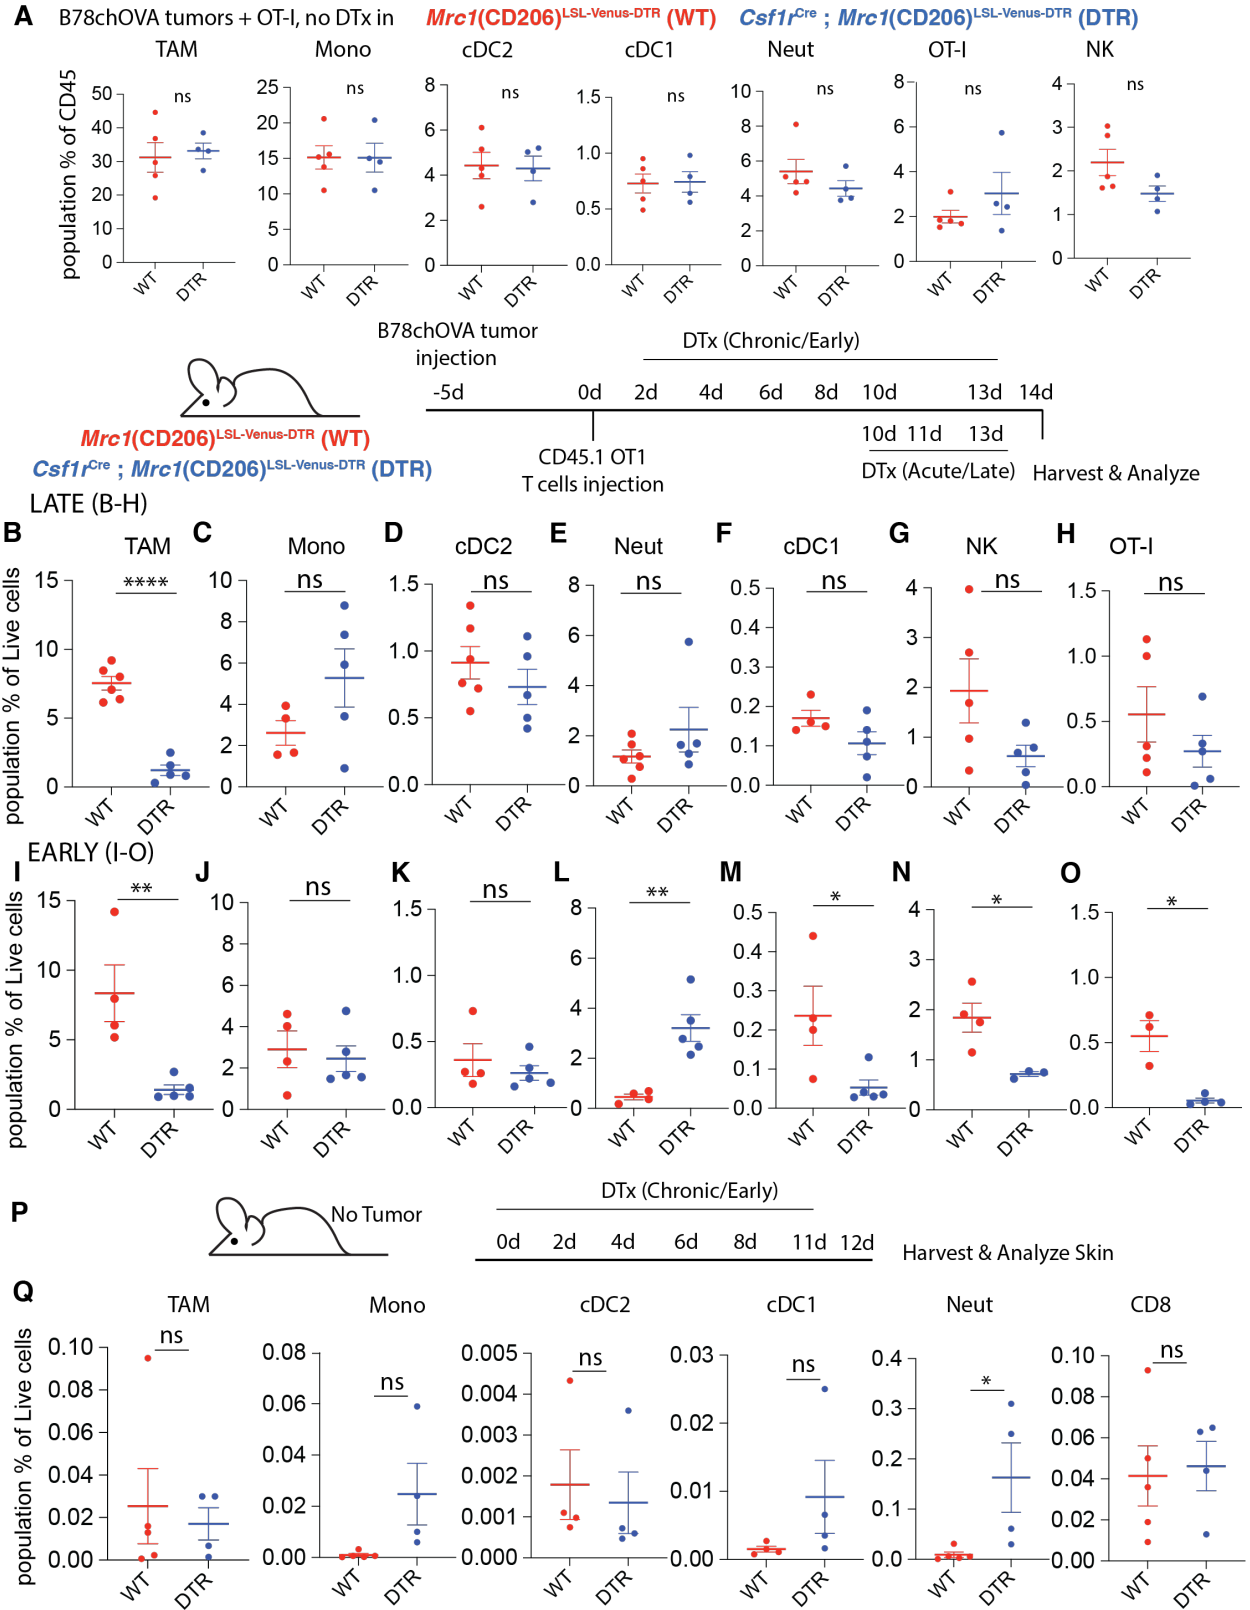

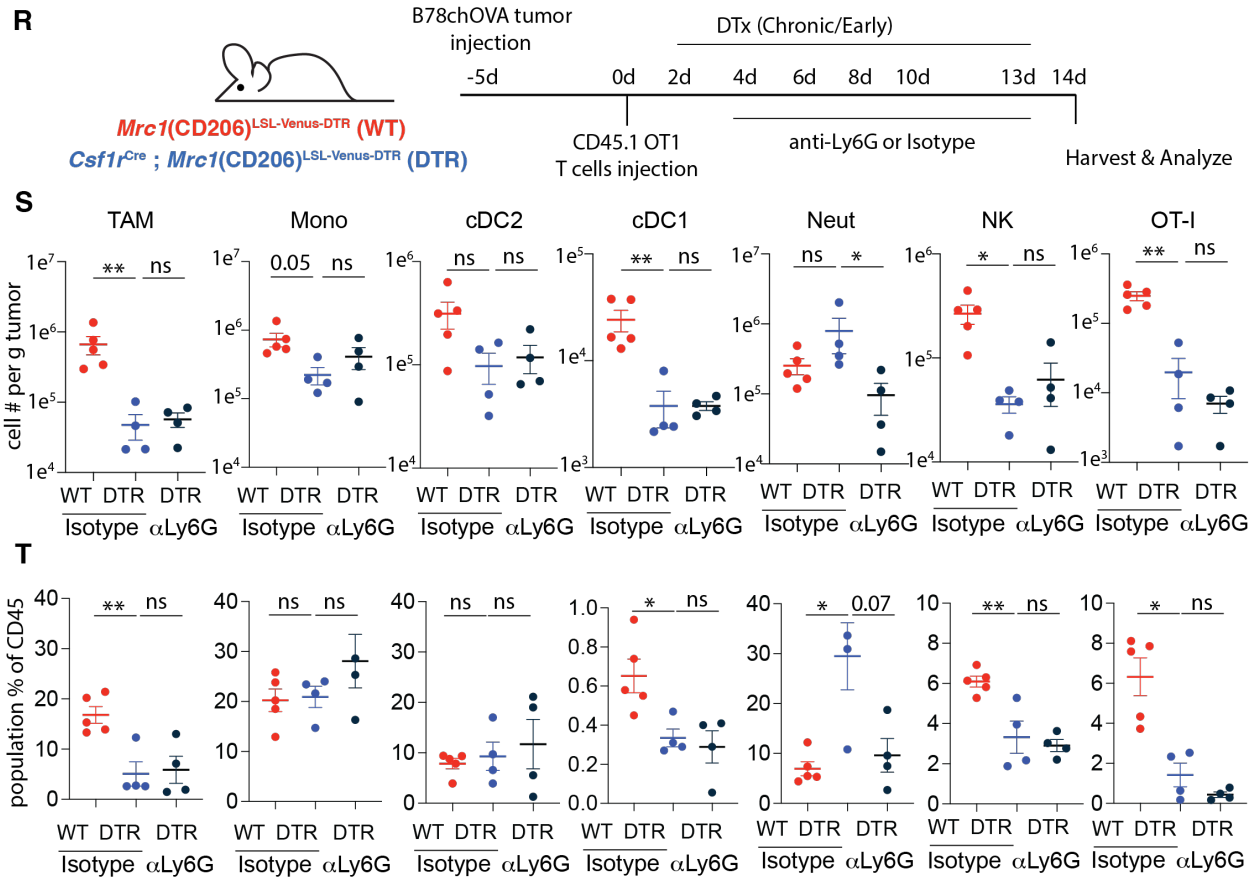

838  
839

840

841 **Fig. S2: (A)** Relative abundance of different immune populations as a percentage of CD45+ cells  
 842 in *Mrc1*<sup>LSL-Venus-DTR</sup> (WT) and *Csf1r*<sup>Cre</sup>; *CD206*<sup>LSL-Venus-DTR</sup> (DTR) mice with B78chOVA tumors (day-  
 843 5), OT-I adoptive transfer (day 0) and harvest at d14 without DTx administration; Schematic  
 844 representation of the experimental setup for tumor injection, OT-I T cell adoptive transfer, early  
 845 and late diphtheria toxin administration and analysis; Relative abundance of different immune  
 846 populations as a percentage of live cells with (B-H) late and (I-O) early depletion regimens. (P)  
 847 Schematic representation of the experimental setup for analysis of skin in *Mrc1*<sup>LSL-Venus-DTR</sup> (WT;  
 848 red) and *Csf1r*<sup>Cre</sup>; *Mrc1*<sup>LSL-Venus-DTR</sup> (DTR; blue) mice with DTx administration; (Q) Relative  
 849 abundance of different immune populations in the skin as a percentage of live cells; (R) Schematic  
 850 representation of the experimental setup for B78chOVA tumor injection, OT-I T cell adoptive  
 851 transfer, and early diphtheria toxin administration with either isotype control or anti-Ly6G antibody  
 852 treatment and analysis; Abundance of different immune populations as (S) cells per g of tumor  
 853 and (T) percentage of CD45+ cells in WT and DTR mice. \*\*\*\*p<0.0001, \*\*p<0.01, \*p<0.05, ns =  
 854 no significance by Student's t-tests or Mann-Whitney test, or ANOVA with post-hoc test correcting  
 855 for false discovery (\*alpha < 0.05, \*\* alpha < 0.01). Bar graph data are shown as mean +/- SEM.

856

857

858

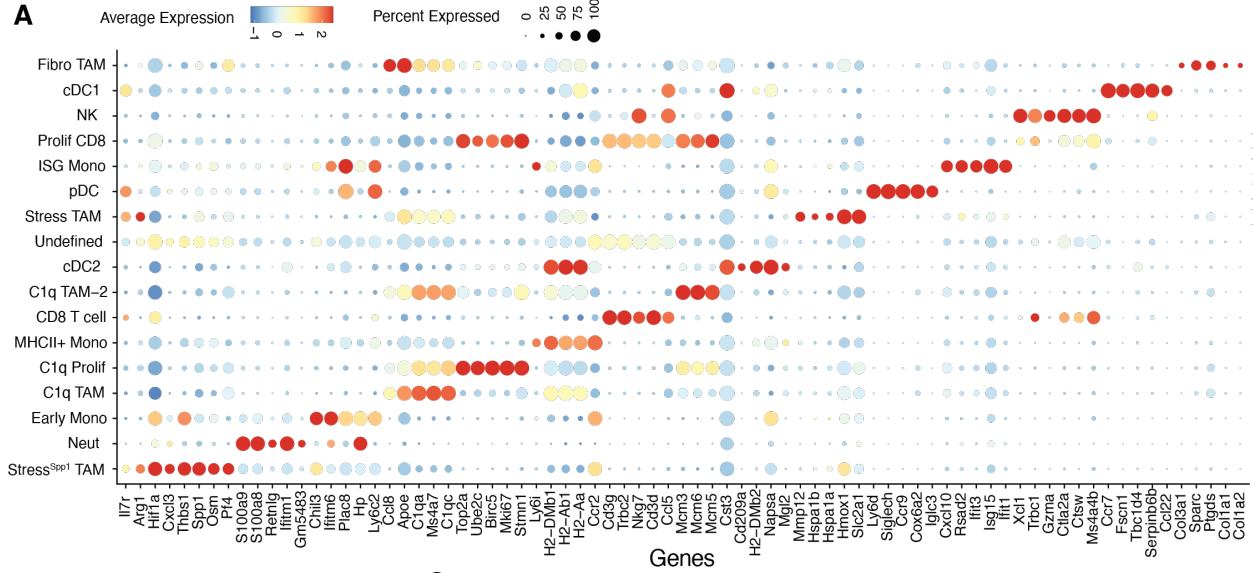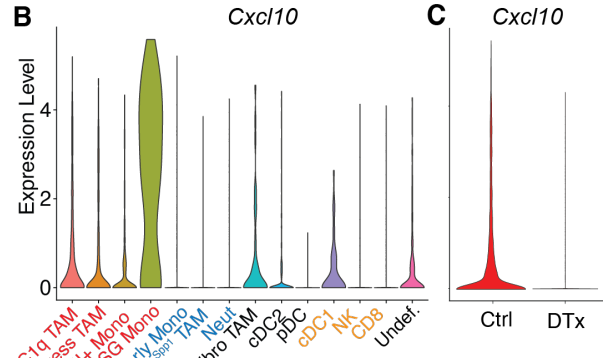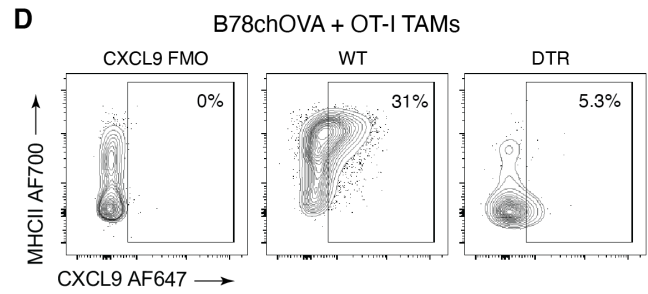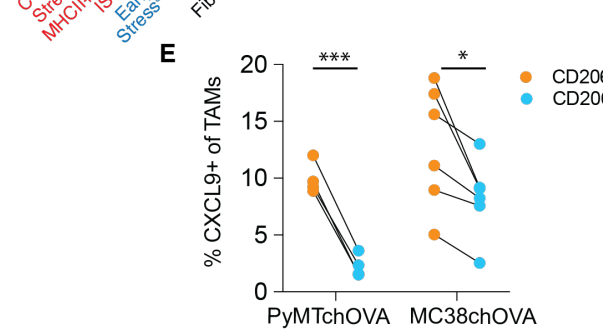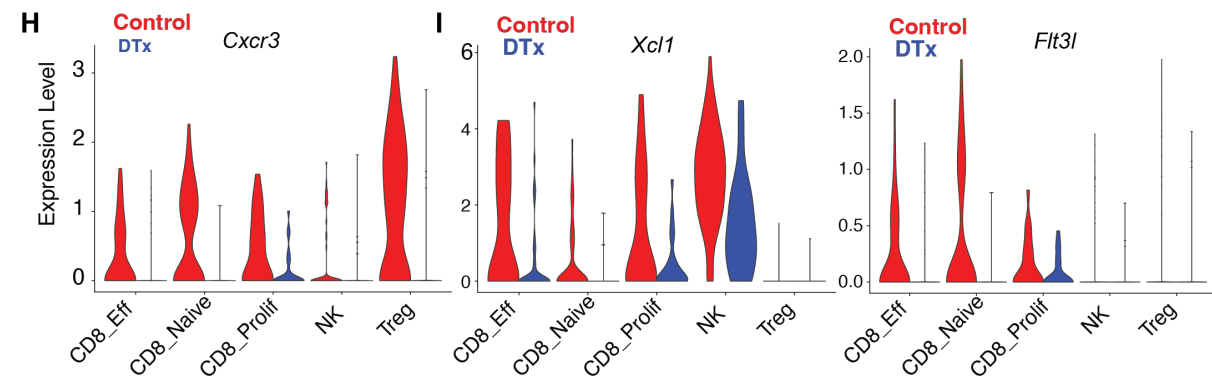

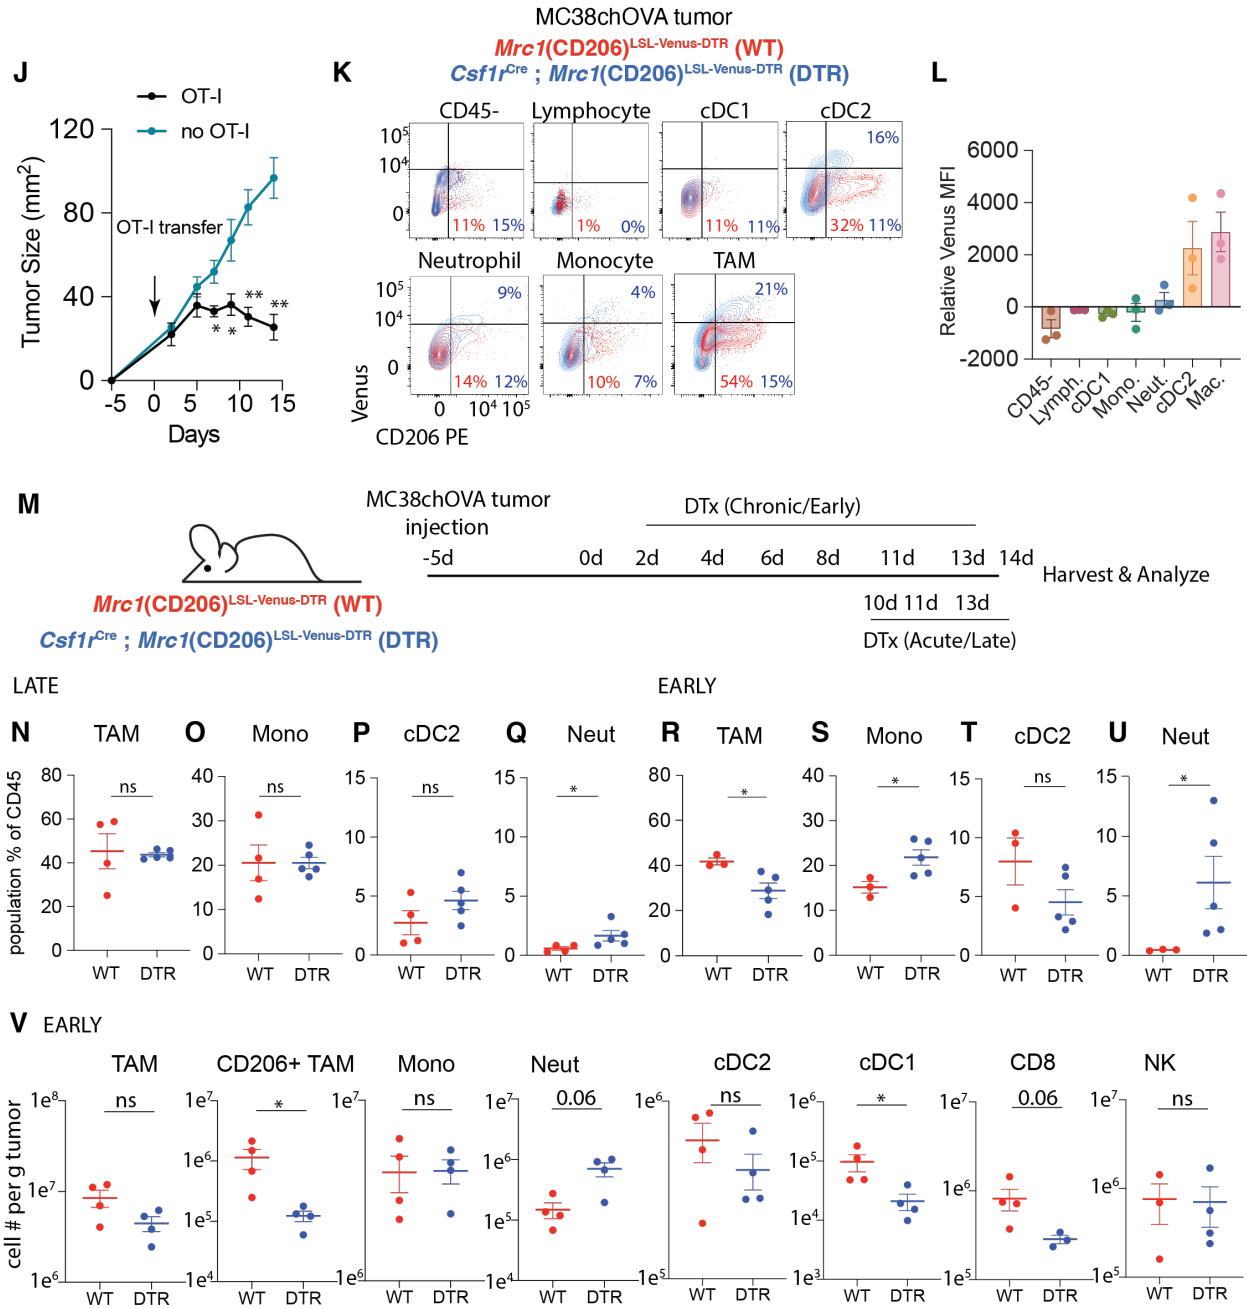

861  
862  
863



864

**W** CD206 Replete and Depleted signatures applied to sorted HLA-DR+ Myeloid Cells  
n >200 patients

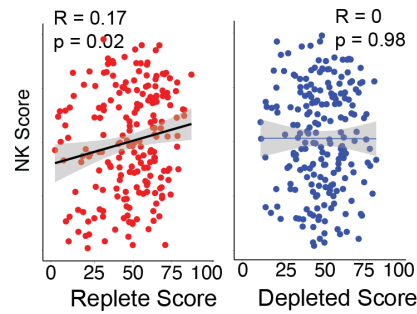

**X** TCGA (top and bottom 20%) — CD206<sup>Replete/Depleted</sup> Ratio<sup>HIGH</sup> (red line) — CD206<sup>Replete/Depleted</sup> Ratio<sup>LOW</sup> (blue line)

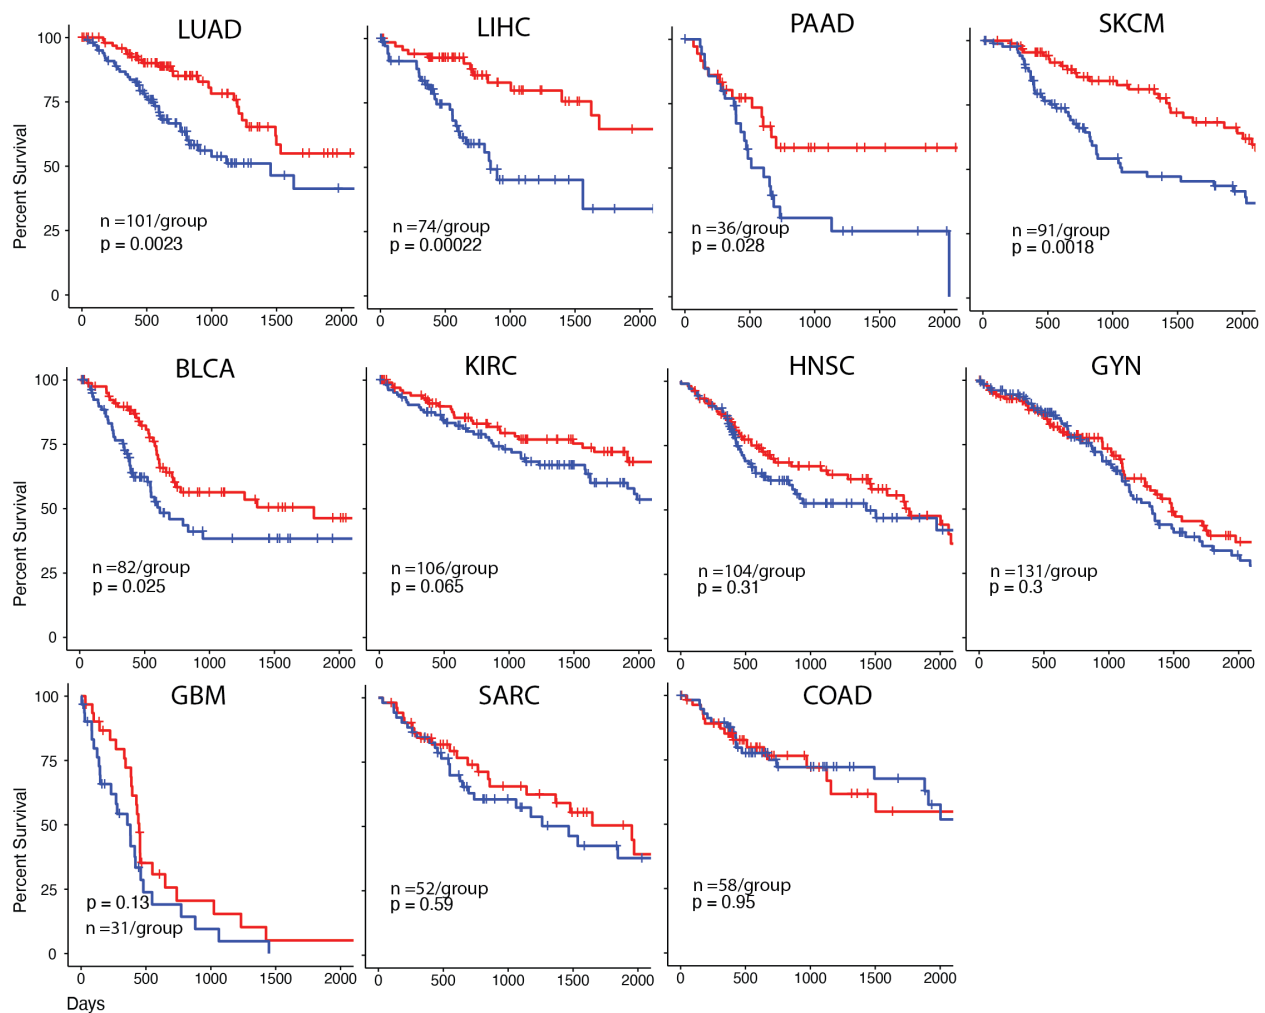

865

866

867 **Fig. S3:** (A) Dotplot representing top5 differentially expressed genes and select other genes in  
 868 each immune cell cluster identified from a harmonized dataset of spatially barcoded Control and  
 869 DTx treated B78chOVA tumors d12 post adoptive transfer of CD2dsRed; OT-I cells; *Cxcl10*  
 870 expression (B) aggregated across treatment conditions by cluster and (C) aggregated across  
 871 clusters by treatment; (D) Representative flow cytometry plots showing CXCL9 expression in

872 B78chOVA TAMs with or without DTx mediated depletion; **(E)** CXCL9 expression in PyMTchOVA  
873 and MC38chOVA (both without OT-I adoptive transfer) TAMs split by their CD206 expression; **(F)**  
874 CXCL9 expression in OT-I treated B78chOVA (d14 post adoptive transfer) monocytes and **(G)**  
875 relative abundance of CXCL9+ TAMs and Monocytes in the same context; Violin plot representing  
876 **(H)** *Cxcr3*, **(I)** *Xcl1* and *Flt3l* expression in the lymphoid compartment in Control and DTx treated  
877 conditions; **(J)** Representative time course of MC38chOVA tumor size with or without adoptive  
878 transfer of OT-I T cells; **(K)** Overlaid flow cytometry plots showing reporter (Venus) and CD206  
879 expression in different immune cells in MC38chOVA tumors in WT (red; *Mrc1*<sup>LSL-Venus-DTR</sup>) and  
880 DTR (blue; *Csf1r*<sup>Cre</sup>; *Mrc1*<sup>LSL-Venus-DTR</sup>) mice and **(L)** quantification of relative reporter expression  
881 (DTR – WT) in the different subsets. **(M)** Schematic representation of the experimental setup for  
882 early and late CD206+ TAM depletion in MC38chOVA tumors using *Mrc1*<sup>LSL-Venus-DTR</sup> (WT) and  
883 *Csf1r*<sup>Cre</sup>; *Mrc1*<sup>LSL-Venus-DTR</sup> (DTR) mice; Relative abundance of different immune populations as a  
884 percentage of CD45+ cells with **(N-Q)** late and **(R-U)** early depletion regimens. **(V)** Abundance of  
885 different immune populations as total number of cells per g of MC38chOVA tumor in WT and DTR  
886 mice by the early DTx administration regimen; **(W)** Scatter plots of the CD206<sup>Replete</sup> and  
887 CD206<sup>Depleted</sup> Mono/Mac score per patient with the NK cell score (Pearson R and p value for the  
888 null hypothesis that there is not a correlation are noted); **(X)** Kaplan-Meier survival curves of  
889 patients grouped by the value of the CD206<sup>Replete</sup>: CD206<sup>Depleted</sup> signature ratio (top and bottom  
890 20%) from TCGA split by indications, p values for the log-rank test are noted for each curve in  
891 **(X)** bar graph data are mean +/- SEM, \*\*\*\*p<0.0001, \*\*p<0.01, \*p <0.05, ns = no significance by  
892 paired ratio t-tests (E, F) or unpaired t-tests or Mann-Whitney test.  
893
